# Supplementary material
Source: PubMed Central journal article supplement (PMC6455937)

# Supplementary Figure, McElroy et al. RVFV Biomarkers

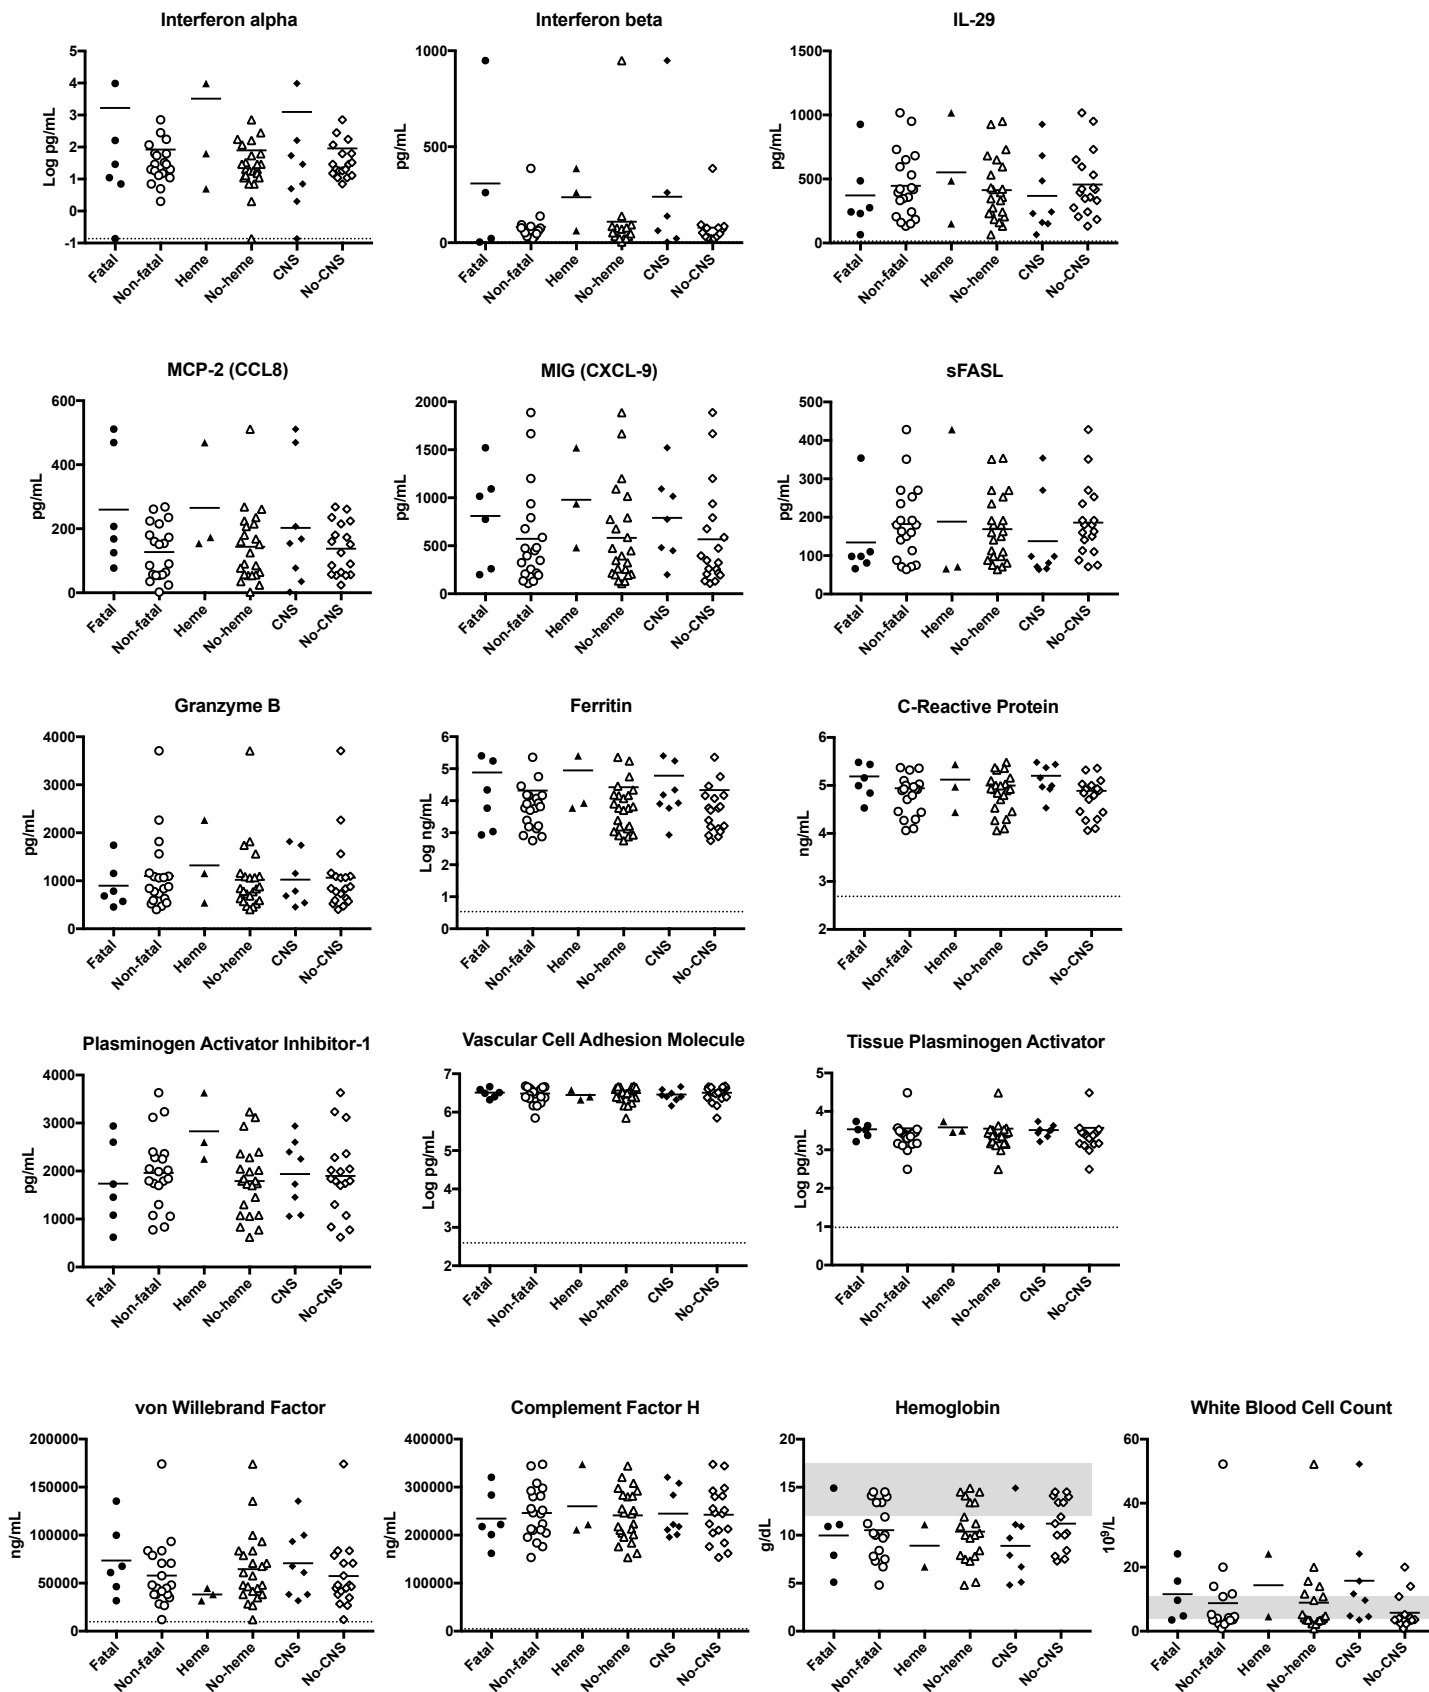

Supplement: jiy393_suppl_supplement_figure.pdf [file jiy393_suppl_supplement_figure.pdf]
